# Supplementary material for: Does prenatal alcohol exposure cause a metabolic syndrome? (Non-)evidence from a mouse model of fetal alcohol spectrum disorder
Source: PubMed Central journal article supplement (PMC6023152; doi:10.1371/journal.pone.0199213), 2018-06-28

# Supplemental Figure 3

**A**

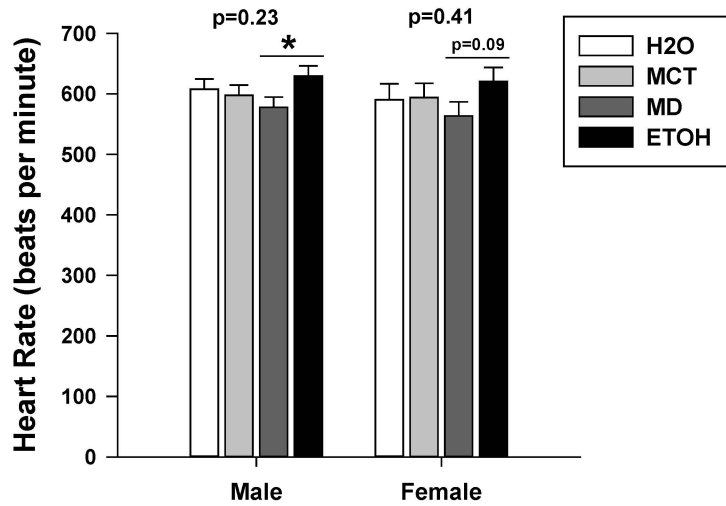

**B**

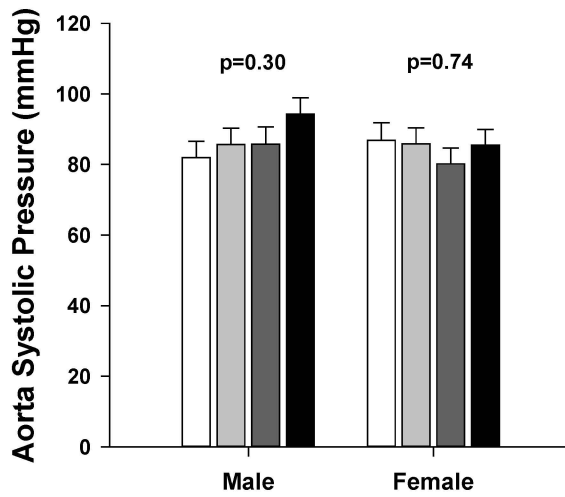

**C**

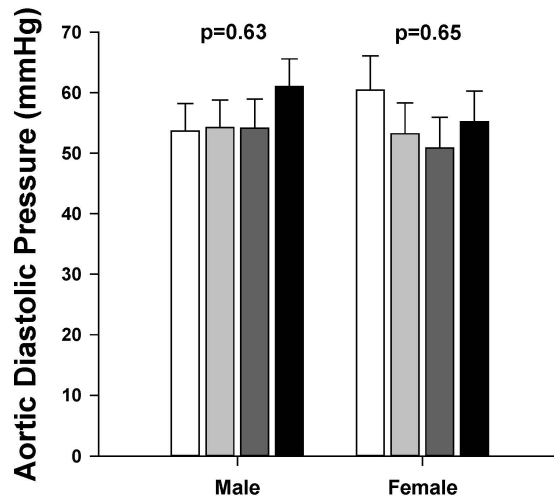

Supplement: pone.0199213.s003.pdf [file pone.0199213.s003.pdf]
